# Supplementary material
Source: PubMed Central journal article supplement (PMC6839957)

## Supplementary Methods, Clinical Information, Tables, and Figure Legends

### *Clonality Analysis and Sequencing*

Read alignments were performed using a pipeline implemented in the Genome Modeling System<sup>1</sup> using the Common Workflow Language (CWL)<sup>2</sup>. Each run was executed on a compute cluster using Toil<sup>3</sup> as the workflow execution engine and platform LSF (IBM) as the job scheduler. Briefly, paired 2x150 bp reads were aligned to the human reference genome (version GRCh38) that had been supplemented with a list of cancer associated viral genome sequences including HTLV-1 (NC\_001436.1 / AF033817.1) obtained from the NCI Genomic Data Common reference and decoy sequences obtained from the 1000 genomes project<sup>4</sup>. Alignments were performed with bwa mem version 0.7.15 (r1140) using default parameters except: '-K 100000000 -t 8 -Y -p'. The resulting alignment file was position sorted using SamBlaster<sup>5</sup> and duplicate reads were marked using Picard MarkDuplicates<sup>6</sup>. Sorted alignment files were indexed with samtools index<sup>7</sup>. Reads alignments were filtered to identify read pairs where one read of the pair aligned to the HTLV-1 genome and the other aligned a human genome reference sequence. Next the alignment start sites of all read alignments corresponding to the human reference genome were extracted and stored in a .bed format. Every human chromosome of the human reference genome was divided into 1000 bp segments using bedtools makewindows<sup>8,9</sup>. The number of alignment start positions falling within each 1000 bp segment were then determined using bedtools intersect. The counts for each region of the genome supporting an integration site were summarized in a table and normalized to account for differences in sequencing depth across the samples. The percentage of reads supporting a particular site was compared to the count of all HTLV integration site reads. Top integration sites were manually reviewed and counts for adjacent genome segments representing the same actual integration site were merged. These data were summarized to create Fig S7. Genomic DNA from patient samples was submitted to Invivoscribe for TRB and TRG gene rearrangement analysis and quantitation and genomic DNA from patient 3 was processed for common genomic substitutions using the "Nexcourse Complete" platform through Genoptix.

## References

1. Griffith M, Griffith OL, Smith SM, et al. Genome modeling system: a knowledge management platform for genomics. *PLoS Computational Biology*. 2015;11:e1004274.
2. Chapman B, Chilton J, Heuer M, et al. Common Workflow Language, v1.0. In: Amtstutz P, Crursoe MR, Tijanic N eds; 2016.
3. Vivian J, Rao AA, Nothaft FA, et al. Toil enables reproducible, open source, big biomedical data analyses. *Nature Biotechnology*. 2017;35:314-316.
4. The Genomes Project C, Auton A, Abecasis GR, et al. A global reference for human genetic variation. *Nature*. 2015;526:68.
5. Faust GG, Hall IM. SAMBLASTER: fast duplicate marking and structural variant read extraction. *Bioinformatics*. 2014;30:2503-2505.
6. Van der Auwera GA, Carneiro MO, Hartl C, Poplin R, Del Angel G, Levy-Moonshine A, Jordan T, Shakir K, Roazen D, Thibault J, Banks E, Garimella KV, Altshuler D, Gabriel S, DePristo MA. From FastQ data to high confidence variant calls: the Genome Analysis Toolkit best practices pipeline. *Curr Protoc Bioinformatics*. 2013;43:11.10.1-33..
7. Li M, Kesic M, Yin H, Yu L, Green PL. Kinetic analysis of human T-cell leukemia virus type 1 gene expression in cell culture and infected animals. *Journal of Virology*. 2009;83:3788-3797.
8. Quinlan AR, Hall IM. BEDTools: a flexible suite of utilities for comparing genomic features. *Bioinformatics*. 2010;26:841-842.
9. Quinlan AR. BEDTools: the Swiss-Army tool for genome feature analysis. *Current Protocols in Bioinformatics*. 2014;47:11.12.11-34.

Genes sequenced by Genoptix for Patient 3

ABL1  
ABL2  
AKT1  
AKT2  
AKT3  
ALK  
APC  
AR  
ARAF  
ARHGEF1  
ARID1A  
ARID2  
ASXL1  
ATM  
ATRX  
AXL  
B2M  
BAP1  
BCL2  
BCL2L11  
BCL6  
BCOR  
BIRC3  
BRAF  
BRCA1  
BRCA2  
BTK  
CALR  
CARD11  
CBL  
CCND1  
CCND2  
CCND3  
CCNE1  
CD274  
CD33  
CD79A  
CD79B  
CDH1  
CDK2  
CDK4  
CDK6  
CDKN1B  
CDKN2A  
CDKN2B  
CEBPA

Genes sequenced for all patients

IRF4  
PLCG1  
CARD11  
CD28  
PRDM1  
HLA-A  
TP53  
CDKN2A  
GATA3  
TBL1XR1  
NOTCH1  
CEBPA  
BCL11B  
GPR183  
PAK2  
DLG1  
CD247  
SYNCRIP  
NRXN3  
CD58  
VAV1  
HLA-B  
ATXN1  
PDCD1  
CD274  
PDL1  
ARID2  
COPS4  
FAS  
CELF2  
POT1  
CBLB  
IRF2BP2  
TET2  
IKZF2  
PRKCB  
CCR7  
CCR4  
STAT3  
RHOA

CHD1  
CHEK2  
CIC  
CIITA  
CREBBP  
CRLF2  
CSF1R  
CSF3R  
CTCF  
CTNNB1  
CXCR4  
DAXX  
DDR2  
DDX3X  
DDX41  
DIS3  
DNMT3A  
EBF1  
EGFR  
EGR1  
EIF1AX  
EP300  
EPCAM  
EPHA2  
EPOR  
ERBB2  
ERBB3  
ERBB4  
ESR1  
ETNK1  
ETV6  
EWSR1  
EZH2  
FAM46C  
FAS  
FAT1  
FBXW7  
FGF19  
FGFR1  
FGFR2  
FGFR3  
FLT1  
FOXO1  
FUBP1  
GAB2  
GATA2  
GATA3

GNA11  
GNA13  
GNAI2  
GNAQ  
GNAS  
GNB1  
H3F3A  
HIF1A  
HIST1H1E  
HNF1A  
HRAS  
ID3  
IDH1  
IDH2  
IGF1R  
IKBKB  
IKZF1  
IKZF3  
IRAK4  
ITPKB  
JAK1  
JAK2  
JAK3  
KDR  
KEAP1  
KIT  
KLF2  
KRAS  
MALT1  
MAP2K1  
MAP2K2  
MAP2K4  
MAP3K1  
MAP3K14  
MAP3K9  
MAPK1  
MCL1  
MDM2  
MDM4  
MED12  
MEF2B  
MET  
MITF  
MLH1  
KMT2D  
MPL  
MSH2

MSH6  
MTOR  
MYC  
MYCN  
MYD88  
NF1  
NF2  
NFKBIE  
NOTCH1  
NOTCH2  
NOTCH3  
NPM1  
NRAS  
NT5C2  
NTRK1  
NTRK2  
NTRK3  
P2RY8  
PALB2  
PBRM1  
PDGFRA  
PDGFRB  
PHF6  
PIK3CA  
PIK3CD  
PIK3R1  
PIM1  
PLCG1  
PLCG2  
PMS2  
POLE  
POT1  
PPM1D  
PRDM1  
PRPS1  
PTCH1  
PTEN  
PTPN11  
RAC1  
RAD21  
RB1  
REL  
RET  
RHEB  
RHOA  
RICTOR  
RIPK1

RIT1  
RNF43  
ROS1  
RPS15  
RUNX1  
S1PR2  
SAMHD1  
SETBP1  
SETD2  
SF3B1  
SGK1  
SH2B3  
SMAD4  
SMARCB1  
SMC1A  
SMC3  
SMO  
SOCS1  
SOX2  
SPEN  
SPOP  
SRSF2  
STAG2  
STAT3  
STAT5B  
STAT6  
STK11  
TBL1XR1  
TCF3  
TERT  
TET2  
TGFB1  
TGFB2  
TLR2  
TNFAIP3  
TNFRSF14  
TP53  
TRAF2  
TRAF3  
TSC1  
TSC2  
U2AF1  
UBR5  
VHL  
WT1  
XPO1  
ZFHX4

ZMYM3  
ZRSR2

## **Clinical Summary of Patients Participating on NCT02631746: Phase II Trial of Nivolumab in Treating Patients with HTLV-Associated T-Cell Leukemia/Lymphoma**

### **Patient 1:**

The patient was a 58-year-old female from Chile with long standing chronic subtype ATLL who had progressive worsening of multiple subcutaneous lesions and had approximately twenty palpable nodules on her extremities and torso that included several 5 centimeter tumors at the initiation of treatment. The patient's laboratory data at the start of protocol treatment were unremarkable with hemoglobin of 10.3 g/dL, platelet count of 160,000/mm<sup>3</sup>, white blood cell count (WBC) of 4140/mm<sup>3</sup>, absolute lymphocyte count (ALC) 190/mm<sup>3</sup>, slightly elevated ALT 48 U/L, AST 36 U/L, alkaline phosphatase 177 U/L, and LDH 265 U/L.

Within the first week following her initial treatment the patient noted new warmth, swelling and tenderness of nearly all of her multiple cutaneous lesions. When seen prior to her planned second Nivolumab infusion 2 weeks after her initial treatment, the patient's physical exam confirmed her report and showed swelling, tenderness and increased warmth of her ATLL lesions compared to normal adjacent areas of skin. Laboratory results at this time showed a significant increase in her LDH (809 IU) and new elevations of total (1.3mg/dl) and direct bilirubin (0.7mg/dl), increased WBC 7880, ALC 510 and appearance of a new population of abnormal mononuclear cells that constituted 7% of her peripheral blood leukocytes.that resulted in holding her planned second and ultimately third doses of treatment. The patient was started on high dose corticosteroid treatment for presumptive immune related complications. The patient also began to complain of left upper quadrant abdominal discomfort and was noted to have new splenomegaly, This physical exam finding was confirmed by ultrasound and MRI of the abdomen that showed new splenomegaly (14.7 cm → 23cm), multiple splenic infarcts, but no evidence of hepatic or biliary drainage system abnormalities (Figure S1) and her corticosteroids were discontinued. Coincidental to these events, the patient was also noted to have a rapid increase in atypical appearing lymphocytes classic for ATLL cells in her peripheral blood (Figure S1). To clarify the nature of these developments, the patient had a biopsy of a cutaneous tumor, flow cytometry analysis of her peripheral blood cells and a biopsy of her spleen. Flow cytometry analysis, immunohistochemical and pathologic analysis of the tissue specimens showed that the patient had developed a new population of double CD4<sup>neg</sup> CD8<sup>neg</sup>, strongly CD25<sup>+</sup>, CD3<sup>+</sup> lymphocytes in the peripheral blood that constituted nearly all the cells in the biopsies of her cutaneous tumor and spleen. These lymphocytes were phenotypically distinct from the CD3<sup>low</sup> CD4<sup>+</sup>CD25<sup>+</sup> ATLL cells the patient had prior to starting treatment (Figure S1). The patient had progressive increase in the WBC, absolute lymphocyte count and abnormal mononuclear cells, continued worsening of her skin lesion and splenic enlargement. The patient was taken off protocol for rapidly progressive disease on 4 April and began palliative radiation therapy to her spleen and most symptomatic skin lesions.

| Date (2017)                               | 24 FEB | 9 MAR | 16 MAR | 23 MAR | 30 MAR | 7 APR |
|-------------------------------------------|--------|-------|--------|--------|--------|-------|
| LDH (U/L)                                 | 286    | 809   | 1335   | 900    | ND     | ND    |
| WBC/mm <sup>3</sup>                       | 3470   | 7880  | 11630  | 12000  | 31720  | 40660 |
| ALC/mm <sup>3</sup>                       | 230    | 510   | 950    | 1090   | 2730   | 1320  |
| Percent "Other cells"                     | <1%    | ND    | 23.5%  | ND     | 36.7%  | 38.8% |
| Total Bilirubin (mg/dL)                   | 0.2    | 0.7   | 1.8    | 0.5    | ND     | ND    |
| HTLV-1 Proviral DNA Load<br>(copies/PBMC) | 0.02   | ND    | ND     | 1.25   | ND     | ND    |

## Patient 2

Patient 2 was a 54 year old Jamaican woman with a past medical history significant only for ATL. She presented with cutaneous manifestations that first developed in January, 2015. It was initially thought that she had mycosis fungoides, and she was subsequently diagnosed with smoldering ATLL when HTLV1 IgG was identified, and bone marrow biopsy demonstrated 5% involvement by malignant CD4+ cells approximately 2 years prior to joining the clinical trial. Her previous treatments included: clobetasol, imiquimod and topical mechlorethamine for which she had partial and intermittent clinical responses. Approximately 8 months prior to joining the clinical trial, she developed two large cutaneous lesions, one on the right neck, and one on the left flank requiring radiotherapy to 800 cGy once to each lesion. In addition to these lesions, she noted progressive skin lesions despite topical therapies, and she was referred for consideration of nivolumab.

Prior to study enrollment, the patient had computerized tomographic scans of the neck, chest, abdomen, and pelvis with no evidence of ATLL. Bone marrow biopsy was performed which demonstrated the presence ATLL in a variable cellular marrow with significant fibrosis, and 60% involvement of the cellular marrow component. PD-1 testing of the bone marrow biopsy was performed and staining was noted in 10-20% of lymphocytes, primarily in fibrotic regions of the biopsy. PD-L1 testing was also conducted on the bone marrow biopsy sample and demonstrated only focal staining of possible histiocytes, which was thought to be non-specific and also in the fibrotic region of the bone marrow. She received her first and only infusion of nivolumab on June 27, 2017. Four days later, the patient developed diffuse aches and flu-like symptoms. Two days after that, labs were drawn and she was noted to have a creatinine of 2.5 mg/dL with a normal calcium level. She was admitted to the hospital and her creatinine improved to 1.53 mg/dL without intervention by the next day and she was discharged and monitored as an outpatient. Her ALC increased from 8230 to 14100 between cycle 1, day 1 (C1D1) and C1D10, and was 11950 by C2D1 when she returned to the treating institution. Nivolumab was held due to grade 3 renal toxicity on C2D1 (July 11, 2017) and there was no change in her cutaneous lesions. Eight days later, on C2D9 the patient presented to her local hospital with nausea, vomiting, fatigue, and elevated calcium to 13.3 mg/dL. The patient was treated with fluids and pamidronate, and positron emission tomography scan on C2D14 demonstrated diffuse uptake throughout the skeleton, lymph nodes, and spleen and bone marrow biopsy demonstrated continued involvement by ATLL in a fibrotic marrow. She was removed from study and initiated on salvage chemotherapy with CHOEP (cyclophosphamide, doxorubicin, vincristine, etoposide, and prednisone) at her local hospital. After 6 cycles of chemotherapy, the patient had total resolution of all skin lesions and disease

on PET scan, and she completed a haploidentical allogeneic stem cell transplant in December 2017 and remains in remission as of last follow-up locally.

| <b>Date (2017)</b>                            | <b>27 JUNE</b>   | <b>3 JULY</b>    | <b>10 JULY</b>   | <b>11 JULY</b>   | <b>17 JULY</b> |
|-----------------------------------------------|------------------|------------------|------------------|------------------|----------------|
| <b>Creatinine (mg/dL)</b>                     | 0.86             | 1.53             | 1.48             | 1.43             | 1.21           |
| <b>Calcium (mg/dL)</b>                        | 9.5              | 12.2             | 11.0             | 9.6              | 12.2           |
| <b>LDH (U/L)</b>                              | 207<br>(ULN 190) | 266<br>(ULN 250) | 260<br>(ULN 250) | 351<br>(ULN 190) | ND             |
| <b>WBC/mm<sup>3</sup></b>                     | 11900            | 16200            | 17000            | 14400            | 15500          |
| <b>ALC/mm<sup>3</sup></b>                     | 8230             | 9977             | 14100            | 11950            | ND             |
| <b>Alkaline Phosphatase (U/L)</b>             | 213              | 274              | 252              | 286              | 460            |
| <b>HTLV-1 Proviral DNA Load (copies/PBMC)</b> | 1.1              | ND               | ND               | ND               | ND             |

### **Patient 3**

Patient 3 was a 41 year old male from Jamaica, who presented six months prior to involvement in the study with acute ATLL with lymphadenopathy, abdominal distention, hypercalcemia, and leukocytosis, with bone marrow and peripheral blood involvement by ATL. The patient received dose-adjusted etoposide, prednisone, vincristine, cyclophosphamide, and doxorubicin, combined with raltegravir and bortezomib for 6 cycles and had a near complete response. He has also received intrathecal methotrexate for CNS prophylaxis. Three months later the patient relapsed with a brain mass and biopsy was consistent with a recurrence of ATLL. He had minimal disease in the rest of his body. Subsequently, he received 1 cycle of high dose methotrexate for his CNS disease and had a prompt remission and was referred for the clinical trial.

During evaluation for nivolumab therapy, the brain magnetic resonance imaging showed stable or improved lesions from the previous scan, and computerized tomographic scans showed right lower lobe pulmonary nodules, mild hilar and subcarinal lymphadenopathy. A bone marrow showed 19% atypical T cells, expressing CD2, CD3, CD4, CD5, and CD25, but no atypical T cells in the peripheral blood. The first and only infusion of nivolumab was given on November 14, 2017. Fourteen days after nivolumab treatment, the patient developed hypercalcemia, elevated transaminases, and renal insufficiency, Peripheral blood flow cytometry showed 30% of nucleated cells to be atypical lymphoid cells with a similar phenotype as that noted in the bone marrow earlier, and computerized tomographic scan showed new splenomegaly, and worsening mesenteric, retroperitoneal, pelvic, and inguinal adenopathy, and the patient was taken off protocol. The patient was initiated on salvage chemotherapy with ifosfamide, carboplatin, and etoposide on Dec 2, 2017. He initially responded to salvage chemotherapy, but after 2 cycles his disease progressed further and in the next few months, the patient passed away in peace.

| <b>Date (2017)</b>                                | <b>14 NOV</b> | <b>21 NOV</b> | <b>28 NOV</b> | <b>2 DEC</b> | <b>18 DEC</b> |
|---------------------------------------------------|---------------|---------------|---------------|--------------|---------------|
| <b>Creatinine (mg/dL)</b>                         | 1.0           | 1.1           | 1.7           | 1.2          | 1.0           |
| <b>Calcium (mg/dL)</b>                            | 9.8           | 10.4          | 11.8          | 8.5          | 9.4           |
| <b>LDH (U/L)</b>                                  | 318           | 584           | 1143          | 3518         | 525           |
| <b>WBC/mm<sup>3</sup></b>                         | 6900          | 9100          | 10600         | 41200        | 5500          |
| <b>ALC/mm<sup>3</sup></b>                         | 1600          | 2300          | 3200          | 17000        | 1000          |
| <b>Aspartate Amino-<br/>transaminase (U/L)</b>    | 23            | 49            | 165           | 146          | 55            |
| <b>Alanine Amino-<br/>transaminase (U/L)</b>      | 14            | 36            | 162           | 90           | 76            |
| <b>Alkaline Phosphatase<br/>(U/L)</b>             | 83            | 134           | 402           | 324          | 153           |
| <b>Total Bilirubin (mg/dL)</b>                    | 0.9           | 0.4           | 1.0           | 21.7         | 1.5           |
| <b>HTLV-1 Proviral DNA<br/>Load (copies/PBMC)</b> | 0.28          | ND            | 0.67          | ND           | ND            |

# Table S1: TCR Gene Rearrangement -TRG Analysis

| Rank                       | Sequence                              | Length | Merge count | V-gene | J-gene | % total reads | Cumulative % | CDR3 Sequence                          |
|----------------------------|---------------------------------------|--------|-------------|--------|--------|---------------|--------------|----------------------------------------|
| 1                          | TGGGTAAGACAAGCAACAAAGTGGAGGCAAGAAAG   | 144    | 90769       | Vg10   | JgP1   | 39.37         | 39.37        | GCTGCGTATACCACTGGTTGGTTCAAGATA         |
| 2                          | AGAATCAGTAGAGGAAAGTATTTTACTTATGCAAGC/ | 139    | 33237       | Vg3    | JgP1   | 14.42         | 53.79        | not found                              |
| 3                          | GGAATCAGTCGAGAAAAGTATCATACTTATGCAAGC  | 144    | 23095       | Vg8    | JgP1   | 10.02         | 63.81        | not found                              |
| 4                          | GGAATCAGCCCAGGGAAGTATGATACTTACGGAAG/  | 139    | 2219        | Vg4    | Jg1/2  | 0.96          | 64.77        | GCCACCTCACACAGCCTAAGAAATCT             |
| 5                          | GGAATCAGCCCAGGGAAGTATGATACTTATGGAAG/  | 148    | 2058        | Vg4    | JgP1   | 0.89          | 65.67        | GCCACCTGGGATAGCGGGGGACTGGTTGGTTCAAGATA |
| <b>Sample 1B</b>           |                                       |        |             |        |        |               |              |                                        |
| <b>Total count 453,436</b> |                                       |        |             |        |        |               |              |                                        |
| <b>CLONAL</b>              |                                       |        |             |        |        |               |              |                                        |
| Rank                       | Sequence                              | Length | Merge count | V-gene | J-gene | % total reads | Cumulative % | CDR3 Sequence                          |
| 1                          | TGGGTAAGACAAGCAACAAAGTGGAGGCAAGAAAG   | 144    | 396378      | Vg10   | JgP1   | 87.42         | 87.42        | GCTGCGTATACCACTGGTTGGTTCAAGATA         |
| 2                          | AGAATCAGTAGAGGAAAGTATTTTACTTATGCAAGC/ | 139    | 14302       | Vg3    | JgP1   | 3.15          | 90.57        | not found                              |
| 3                          | GGAATCAGTCGAGAAAAGTATCATACTTATGCAAGC  | 144    | 10797       | Vg8    | JgP1   | 2.38          | 92.95        | not found                              |
| 4                          | GGAATCAGCCCAGGGAAGTATGATACTTATGGAAG/  | 148    | 8857        | Vg4    | JgP1   | 1.95          | 94.91        | GCCACCTGGGATAGCGGGGGACTGGTTGGTTCAAGATA |
| 5                          | TGGGTAAGACAAGCAACAAAGTGGAGGCAAGAAAG   | 148    | 588         | Vg10   | JgP1   | 0.13          | 95.03        | not found                              |
| <b>Sample 2A</b>           |                                       |        |             |        |        |               |              |                                        |
| <b>Total count 460,599</b> |                                       |        |             |        |        |               |              |                                        |
| <b>CLONAL</b>              |                                       |        |             |        |        |               |              |                                        |
| Rank                       | Sequence                              | Length | Merge count | V-gene | J-gene | % total reads | Cumulative % | CDR3 Sequence                          |
| 1                          | GGAATCAGCCCAGGGAAGTATGATACTTATGGAAG/  | 141    | 198027      | Vg4    | JgP    | 42.99         | 42.99        | not found                              |
| 2                          | AGAATCAGTAGAGGAAAGTATTTTACTTATGCAAGC/ | 141    | 179179      | Vg3    | Jg1/2  | 38.90         | 81.89        | GCCACCTGGGACAGGCCGGTAAGAAATCT          |
| 3                          | GGAGTCAGTCAGGGAAGTATTATCTTACGCAAGC/   | 126    | 367         | Vg2    | none   | 0.08          | 81.97        | not found                              |
| 4                          | GGAATCAGTCGAGAAAAGTATCATACTTATGCAAGC  | 140    | 248         | Vg8    | JgP1   | 0.05          | 82.03        | not found                              |
| 5                          | GGAGTCAGTCAGGGAAGTATTATCTTACGCAAGC/   | 129    | 245         | Vg2    | JgP2   | 0.05          | 82.08        | not found                              |
| <b>Sample 3A</b>           |                                       |        |             |        |        |               |              |                                        |
| <b>Total count 393,715</b> |                                       |        |             |        |        |               |              |                                        |
| <b>CLONAL</b>              |                                       |        |             |        |        |               |              |                                        |
| Rank                       | Sequence                              | Length | Merge count | V-gene | J-gene | % total reads | Cumulative % | CDR3 Sequence                          |
| 1                          | GGAGTCAGTCAGGGAAGTATTATACTTACGCAAGC/  | 126    | 139454      | Vg2    | none   | 35.42         | 35.42        | not found                              |
| 2                          | GGACTCAGTCAGGAAAGTATTATACTATACACCCC   | 141    | 82516       | Vg3    | Jg1/2  | 20.96         | 56.38        | not found                              |
| 3                          | GGAGTCAGTCAGGGAAGTATTATACTTACGCAAGC/  | 147    | 2864        | Vg2    | Jg1/2  | 0.73          | 57.11        | not found                              |
| 4                          | GGAGTCAGTCAGGGAAGTATTATACTTACGCAAGC/  | 146    | 2792        | Vg2    | Jg1/2  | 0.71          | 57.81        | not found                              |
| 5                          | TGGGTAAGACAAGCAACAAAGTGGAGGCAAGAAAG   | 140    | 2596        | Vg10   | JgP1   | 0.66          | 58.47        | not found                              |
| <b>Sample 3B</b>           |                                       |        |             |        |        |               |              |                                        |
| <b>Total count 340,978</b> |                                       |        |             |        |        |               |              |                                        |
| <b>CLONAL</b>              |                                       |        |             |        |        |               |              |                                        |
| Rank                       | Sequence                              | Length | Merge count | V-gene | J-gene | % total reads | Cumulative % | CDR3 Sequence                          |
| 1                          | GGAGTCAGTCAGGGAAGTATTATACTTACGCAAGC/  | 126    | 166294      | Vg2    | none   | 48.77         | 48.7697153   | not found                              |
| 2                          | GGACTCAGTCAGGAAAGTATTATACTATACACCCC   | 141    | 121295      | Vg3    | Jg1/2  | 35.57         | 84.3423916   | not found                              |
| 3                          | GGACTCAGTCAGGAAAGTATTATACTATACACCCC   | 141    | 1070        | Vg3    | Jg1/2  | 0.31          | 84.6561948   | GCCACCTGGGACAGCGGGGGAGAACTCT           |
| 4                          | GGAGTCAGTCAGGGAAGTATTATACTTACGCAAGC/  | 143    | 952         | Vg2    | Jg1/2  | 0.28          | 84.9353917   | not found                              |
| 5                          | AGAATCAGTAGAGGAAAGTATTTTACTTATGCAAGC/ | 145    | 785         | Vg3    | Jg1/2  | 0.23          | 85.1656119   | not found                              |

Table S2: TCR Gene Rearrangement -TRB Analysis

| Sample      | 1A                                    |        |             |        |        |               |              |                                          |  |
|-------------|---------------------------------------|--------|-------------|--------|--------|---------------|--------------|------------------------------------------|--|
| Total count | 208,170                               |        |             |        |        |               |              |                                          |  |
| CLONAL      |                                       |        |             |        |        |               |              |                                          |  |
| Rank        | Sequence                              | Length | Merge count | V-gene | J-gene | % total reads | Cumulative % | CDR3 Sequence                            |  |
| 1           | CCTTCCCATTTTAATTCAGTGCCTTTGTCTTTTCCAA | 202    | 73946       | Db2    | Jb2-2  | 35.52         | 35.52        | not found                                |  |
| 2           | GGAGGTGAGAAGGAAGCCCCCGGCTGGTCCATA     | 212    | 37587       | Db1    | Jb1-2  | 18.06         | 53.58        | not found                                |  |
| 3           | TATTATAATGGAGAAGAGAGAGCAAAAGGAAACATT  | 174    | 16966       | Vb9    | Jb1-1  | 8.15          | 61.73        | GCCAGCAGCGTACCTGGACAGGGGGGAAAGCTTTC      |  |
| 4           | CCTTCCCATTTTAATTCAGTGCCTTTGTCTTTTCCAA | 201    | 14393       | Db2    | Jb2-1  | 6.91          | 68.64        | not found                                |  |
| 5           | GGAGGTGAGAAGGAAGCCCCCGGCTGGTCCATA     | 262    | 6997        | Db1    | Jb2-5  | 3.36          | 72.00        | not found                                |  |
| Sample      | 1B                                    |        |             |        |        |               |              |                                          |  |
| Total count | 360,431                               |        |             |        |        |               |              |                                          |  |
| CLONAL      |                                       |        |             |        |        |               |              |                                          |  |
| Rank        | Sequence                              | Length | Merge count | V-gene | J-gene | % total reads | Cumulative % | CDR3 Sequence                            |  |
| 1           | CCTTCCCATTTTAATTCAGTGCCTTTGTCTTTTCCAA | 202    | 231911      | Db2    | Jb2-2  | 64.34         | 64.34        | not found                                |  |
| 2           | GGAGGTGAGAAGGAAGCCCCCGGCTGGTCCATA     | 212    | 81838       | Db1    | Jb1-2  | 22.71         | 87.05        | not found                                |  |
| 3           | CCTTCCCATTTTAATTCAGTGCCTTTGTCTTTTCCAA | 201    | 5810        | Db2    | Jb2-1  | 1.61          | 88.66        | not found                                |  |
| 4           | TATTATAATGGAGAAGAGAGAGCAAAAGGAAACATT  | 174    | 4142        | Vb9    | Jb1-1  | 1.15          | 89.81        | GCCAGCAGCGTACCTGGACAGGGGGGAAAGCTTTC      |  |
| 5           | GGAGGTGAGAAGGAAGCCCCCGGCTGGTCCATA     | 262    | 1663        | Db1    | Jb2-5  | 0.46          | 90.27        | not found                                |  |
| Sample      | 2A                                    |        |             |        |        |               |              |                                          |  |
| Total count | 436,559                               |        |             |        |        |               |              |                                          |  |
| CLONAL      |                                       |        |             |        |        |               |              |                                          |  |
| Rank        | Sequence                              | Length | Merge count | V-gene | J-gene | % total reads | Cumulative % | CDR3 Sequence                            |  |
| 1           | AATTATGAAGCCCCAACAAGACAAATCAGGGCTGCC  | 171    | 55944       | Vb7-6  | Jb2-3  | 12.81         | 12.81        | GCCAGCAGCTTAGGCACAGATACGCAGTAT           |  |
| 2           | TTCAATTATGAAGCCCCAACAAGACAAATCAGGGCTG | 174    | 10396       | Vb7-6  | Jb2-3  | 2.38          | 15.20        | GCCAGCAGCTTAGGCACAGATACGCAGTAT           |  |
| 3           | AATTATGAAGCCCCAACAAGACAAATCAGGGCTGCC  | 325    | 7558        | Vb7-6  | Jb2-3  | 1.73          | 16.93        | not found                                |  |
| 4           | TTCAATTATGAAGCCCCAACAAGACAAATCAGGGCTG | 328    | 1258        | Vb7-6  | Jb2-3  | 0.29          | 17.22        | not found                                |  |
| 5           | CAGAGGAAGGTCTGAAATTCATGGTTTATCTCCAGA  | 225    | 886         | Vb18   | Jb2-7  | 0.20          | 17.42        | 3CTCACCACGGGACCGATAAGACCGAGCTCTACGAGCA   |  |
| Sample      | 3A                                    |        |             |        |        |               |              |                                          |  |
| Total count | 509,164                               |        |             |        |        |               |              |                                          |  |
| CLONAL      |                                       |        |             |        |        |               |              |                                          |  |
| Rank        | Sequence                              | Length | Merge count | V-gene | J-gene | % total reads | Cumulative % | CDR3 Sequence                            |  |
| 1           | TTCAAGTTCCTCTTTGAATACTTCAGTGAGACAGAG  | 200    | 136306      | Vb5-1  | Jb2-3  | 26.77         | 26.77        | CCAGCAGCTTGTGTGTGACAGGGAGCACAGATACGCAGTA |  |
| 2           | CTGAGATTGATCTACTACTCACAGATAGTAAATGACT | 206    | 74698       | Vb19   | Jb2-1  | 14.67         | 41.44        | not found                                |  |
| 3           | CCTTCCCATTTTAATTCAGTGCCTTTGTCTTTTCCAA | 234    | 3872        | Db2    | Jb2-5  | 0.76          | 42.20        | not found                                |  |
| 4           | TTCCAGAATGAAGCTCAACTAGACAAATCGGGGCTC  | 178    | 3647        | Vb7-8  | Jb1-4  | 0.72          | 42.92        | GCCAGCAGTCGGGTGCGGGCTAATGAAAACTGTTT      |  |
| 5           | ATGGGCTGAGGCTGATCATTACTCATATGGTGTTA   | 214    | 2960        | Vb10-3 | Jb1-2  | 0.58          | 43.50        | not found                                |  |
| Sample      | 3B                                    |        |             |        |        |               |              |                                          |  |
| Total count | 415,226                               |        |             |        |        |               |              |                                          |  |
| CLONAL      |                                       |        |             |        |        |               |              |                                          |  |
| Rank        | Sequence                              | Length | Merge count | V-gene | J-gene | % total reads | Cumulative % | CDR3 Sequence                            |  |
| 1           | TTCAAGTTCCTCTTTGAATACTTCAGTGAGACAGAG  | 200    | 160594      | Vb5-1  | Jb2-3  | 38.68         | 38.68        | CCAGCAGCTTGTGTGTGACAGGGAGCACAGATACGCAGTA |  |
| 2           | CTGAGATTGATCTACTACTCACAGATAGTAAATGACT | 206    | 129233      | Vb19   | Jb2-1  | 31.12         | 69.80        | not found                                |  |
| 3           | AGGGCCTTCAGTCTCTTTGAATACTTCAGTGAGAG   | 206    | 3897        | Vb5-1  | Jb2-3  | 0.94          | 70.74        | CCAGCAGCTTGTGTGTGACAGGGAGCACAGATACGCAGTA |  |
| 4           | TTCAAGTTCCTCTTTGAATACTTCAGTGAGACAGAG  | 354    | 2493        | Vb5-1  | Jb2-3  | 0.60          | 71.34        | not found                                |  |
| 5           | ACAAGGGCTGAGATTGATCTACTACTCACAGATAGT  | 213    | 2166        | Vb19   | Jb2-1  | 0.52          | 71.86        | not found                                |  |

## Supplemental Figure Legends

**Figure S1: Expansion of CD4-CD8-CD25+PD-1+ ATLL cells in the peripheral blood after nivolumab.** Flow cytometry, CT, and blood counts charting the expansion of a CD4-CD8- (double negative) population of CD25+ atypical cells in the peripheral blood after nivolumab therapy. A quotation of the primary physician's report detailing the changing immunophenotype in this patient.

**Figure S2. Post-relapse ATLL cells express PD-1 and are subject to PD-L1 induced growth inhibition.** PD1 and PDL1 expression before and after nivolumab in Patient 3. Flow cytometry histograms of PD1 and PD1 stained K562 cells, BM biopsy obtained prior to nivolumab therapy, and CD4+CD7- cells obtained from the peripheral blood after nivolumab therapy in patient 3.

### **Figure S3: Reverse Phase Protein Array Analysis on PBMC from Patient 1**

Reverse phase protein array analysis was used to quantitate 301 proteins and phosphoproteins in lysates of PBMC obtained before and after nivolumab therapy in Patient 1. The ratio (after/before) of normalized linear values obtained for each gene was calculated and all proteins undergoing > 3-fold increase or >2-fold decrease after nivolumab are shown. The TCR signaling pathway (red) is the most highly enriched pathway associated with the proteins elevated after nivolumab and ERB-B signaling (green) is most associated with the proteins decreased after nivolumab.

**Figure S4. Mouse models of aggressive ATLL do not recapitulate rapid progression seen in patients.** Nivolumab causes reduced white cell count, reduced human CD4 T cell count and reduced total human cells in PDX model. Mouse PD-1 antibody causes decreased tumor growth in Tax mice. Fewer human T cells expressing CD4, CD8 or CD27 are present in spleen of HTLV-1 infected humanized mice treated with nivolumab compared to PBS.

**Figure S5: Increased Expression of checkpoints in ATLL.** Data from an ATLL gene expression microarray study by Nakano was downloaded from the Gene Expression Omnibus at the NCBI (GEO accession: GSE33615). In the original study, RNA was extracted from PBMCs

isolated from patients with acute (n=26), chronic (n=20), lymphomatous (n=1), and smoldering (n=4) ATLL, and compared to RNA obtained from CD4+ cells from 21 normal subjects. In this study, values were normalized to actin (ACTB) then represented as fold-Patient 10 (a smoldering ATLL sample with the lowest proviral load in the study).

**Figure S6: Immune response in chronic and smoldering forms of ATLL is similar to patients who achieve operational tolerance after allogeneic transplantation.** Analysis of microarray data as described in Figure S7. Red bar represents the median. Genes shown are elevated ( $p < 0.01$ ) in chronic and smoldering disease but not in normal patients or patients with acute ATL.

**Figure S7: Human T-cell leukemia virus (HTLV) integration sites among 5 samples from 3 individuals.** (A) The number of 1KB windows across the genome associated with HTLV reads, the total number of normalized HTLV associated reads, and the total number of mapped (aligned) reads are shown for each sample. (B) The percentage of HTLV reads for each sample associated with an integration site summing to 100%. Binned Sites represent grouped integration sites for which the percentage of HTLV reads was less than 1%. (C) The frequency of normalized HTLV reads associated with the top integration site for each of the three patients is shown in the context of the full chromosomes. The top integration sites occurred on chromosome 2 for two patients (002 and 003) and chromosome 20 for the third patient (001). Triangles represent the top integration site for each sample in terms of the frequency of HTLV reads. Colors for all samples remain the same for each panel in the figure.

**Figure S1: Expansion of CD4-CD8-CD25+PD-1+ ATLL cells in the peripheral blood after nivolumab.** Flow cytometry, CT, and blood counts charting the expansion of a CD4-CD8- (double negative) population of CD25+ atypical cells in the peripheral blood after nivolumab therapy. The patient had a history of HTLV-1 associated adult T-cell leukemia/lymphoma (ATLL). 95% of the lymphoid cells in the blood were abnormal T cells with the majority population (84% of lymphoid cells) expressing partial CD2 (45% positive), spectrum of CD3 from dim to predominately negative, bright CD5, bright CD25, CD45, and bright CD52, but negative for CD4, CD7, CD8, CD26, CD16, CD13, CD14, CD34, CD56, CD57, and TCR gamma delta. A minor sub-population (10.9% of the lymphoid cells) expressed CD2, dim CD3, CD4, spectrum of CD5 from bright to moderate, bright CD25, CD45, and bright CD52, but were negative for CD7, CD8, CD26, CD16, CD13, CD14, CD34, CD56, CD57, and TCR gamma delta. The immunophenotypic data was diagnostic of the patient's HTLV-1-associated adult T-cell leukemia and is consistent with the changing immunophenotype observed in recent specimens from this patient (decreasing CD3, decreasing CD4 and increasing CD5 expression in a sub-population). The neoplastic cells in the spleen were positive for CD3 (mostly cytoplasmic), double negative for CD4 and CD8, weakly and focally positive for PD-1 and show high proliferative rate as per MIB-1. The neoplastic cells in the spleen were positive for Atypical T-cells are strong and diffuse for CD3 and PD1. CD25 and CD30 are focally positive in a similar distribution. PDL1 is positive in the stroma and macrophages. CD20 highlighted rare B-cells in the dermis. The skin biopsy from 2010 was analyzed for PD-1, and only a subset of the atypical cells was positive for it in contrast with the current biopsy. CD3 (mostly cytoplasmic), double negative for CD4 and CD8, weakly and focally positive for PD-1 and show high proliferative rate as per MIB-1.

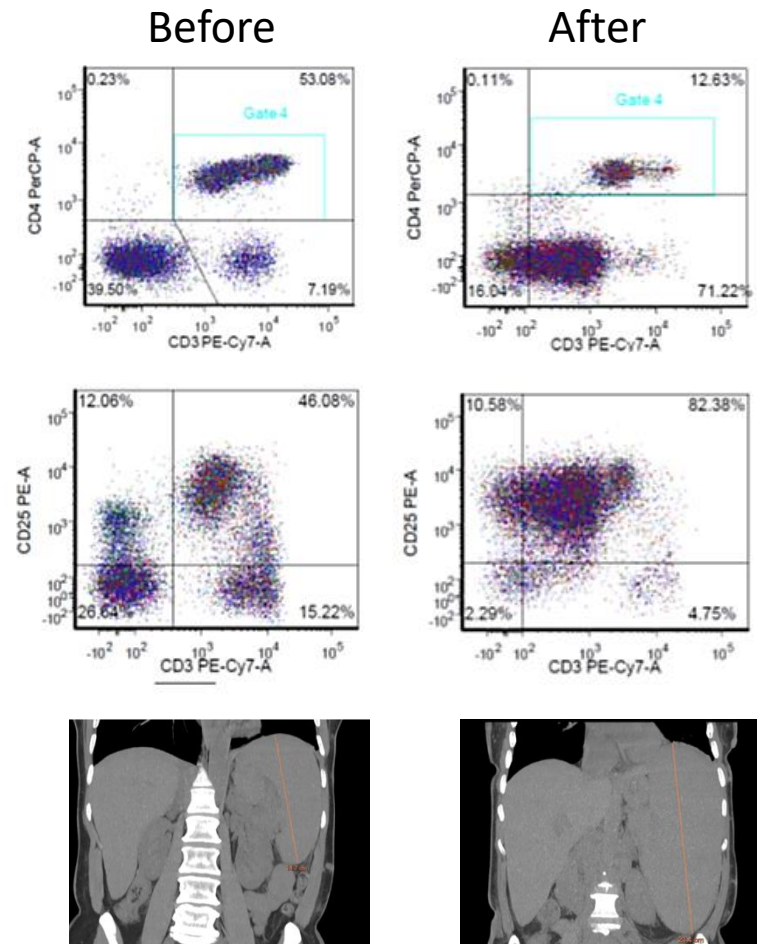

|      |                                           |       |
|------|-------------------------------------------|-------|
| 3470 | WBC/mm <sup>3</sup>                       | 31720 |
| 230  | Absolute lymphocyte count/mm <sup>3</sup> | 2730  |
| -    | Percent "Other cells"                     | 36.7% |

**A**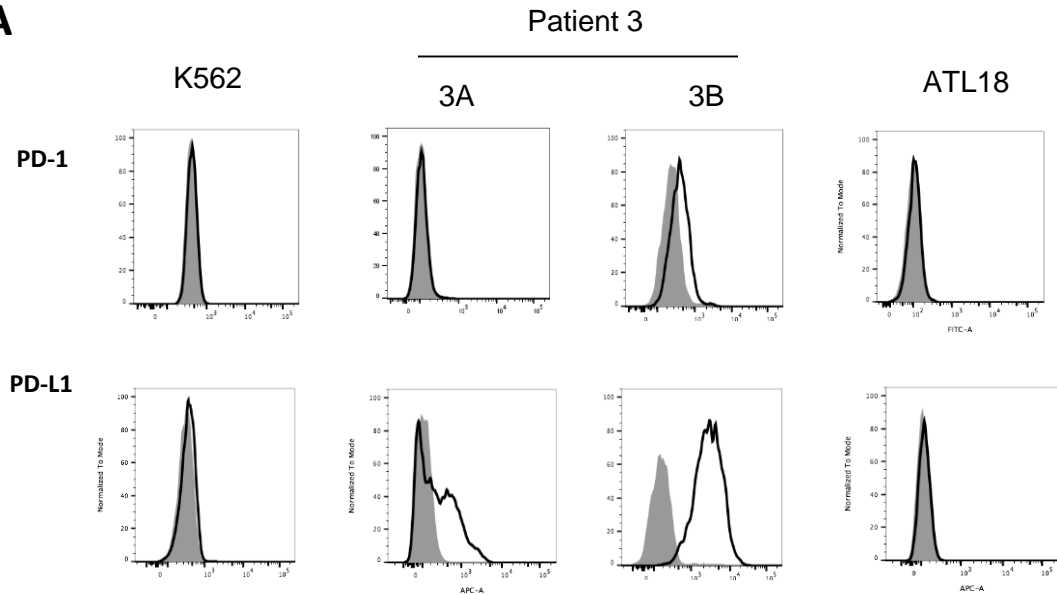

**Figure S2. Post-relapse ATLL cells express PD-1 and are subject to PD-L1 induced growth inhibition.**

A. Flow cytometry measurement of PD-1 and PD-L1 expression on leukemic cells from Patient 3 before (3A) and after (3B) Nivolumab treatment. K562, a negative control for PD-1 and PD-L1 staining. ATL18, an established ATLL cell line. 3A, short-term (5 wk) culture from a bone marrow sample. 3B, total PBMCs. Analysis was gated on CD4+CD7- cells.

B. Effect of PD-L1-Ig on in vitro proliferation of ATLL cells was evaluated with the Cell Counting Kit – SK method. Two-tailed t-test was performed for pairwise comparisons as indicated. n.s., not significant.

**B**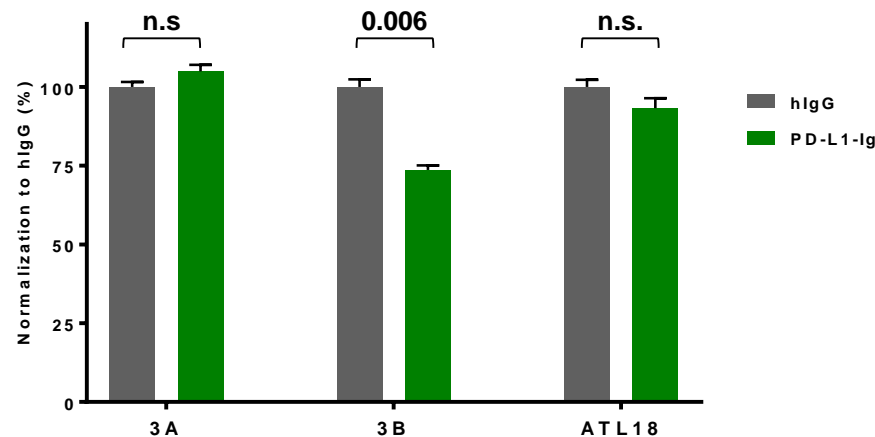

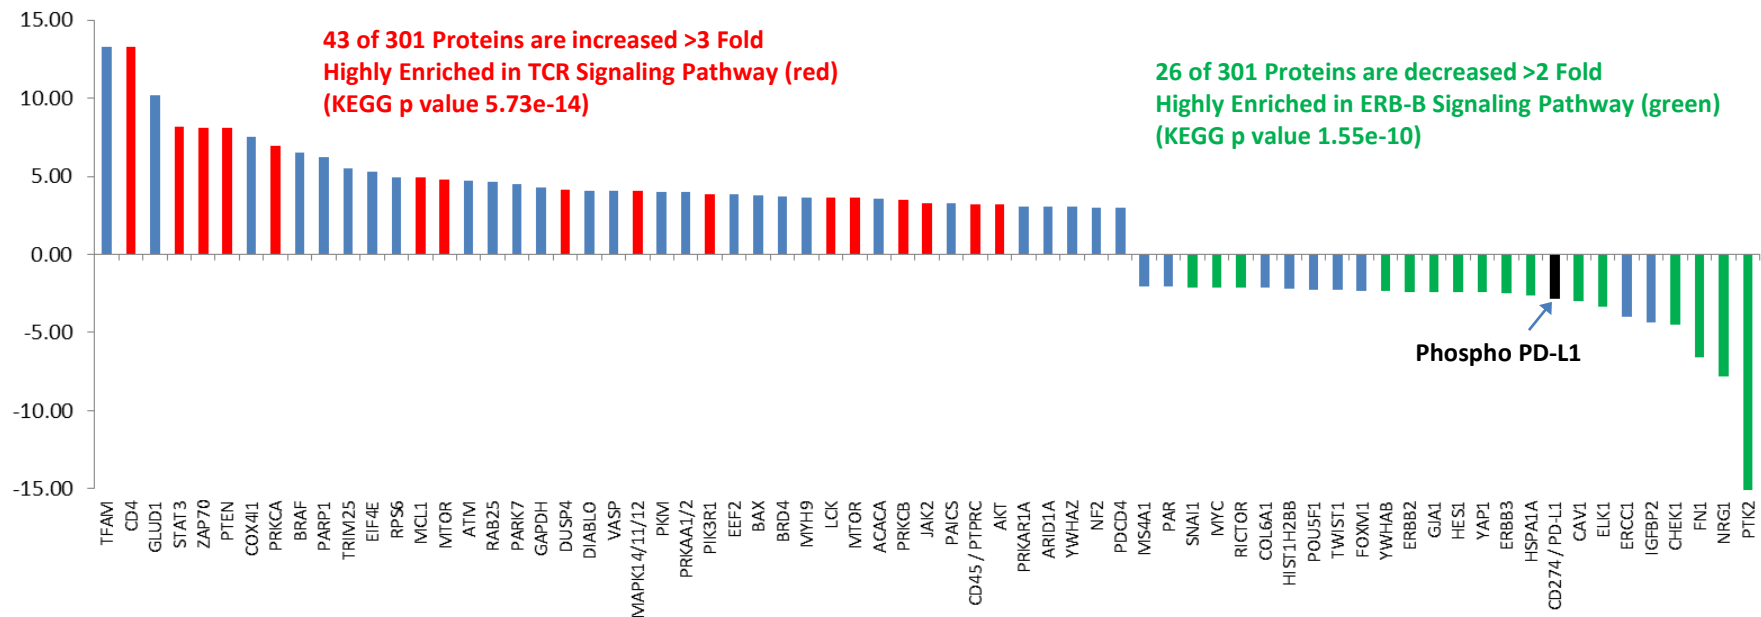

**Figure S3: Reverse Phase Protein Array Analysis on PBMC from Patient 1**

Reverse phase protein array analysis was used to quantitate 301 proteins and phosphoproteins in lysates of PBMC obtained before and after nivolumab therapy in Patient 1. The ratio (after/before) of normalized linear values obtained for each gene was calculated and all proteins undergoing > 3-fold increase or >2-fold decrease after nivolumab are shown. The TCR signaling pathway (red) is the most highly enriched pathway associated with the proteins elevated after nivolumab and ERB-B signaling (green) is most associated with the proteins decreased after nivolumab.

### PDX Model

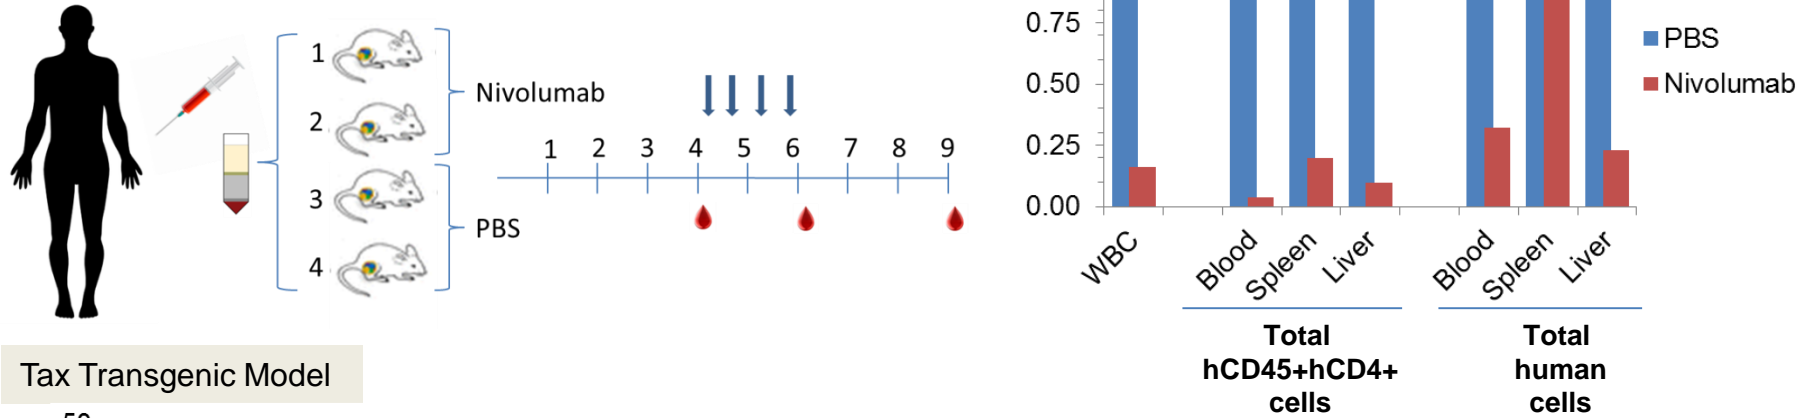

### Tax Transgenic Model

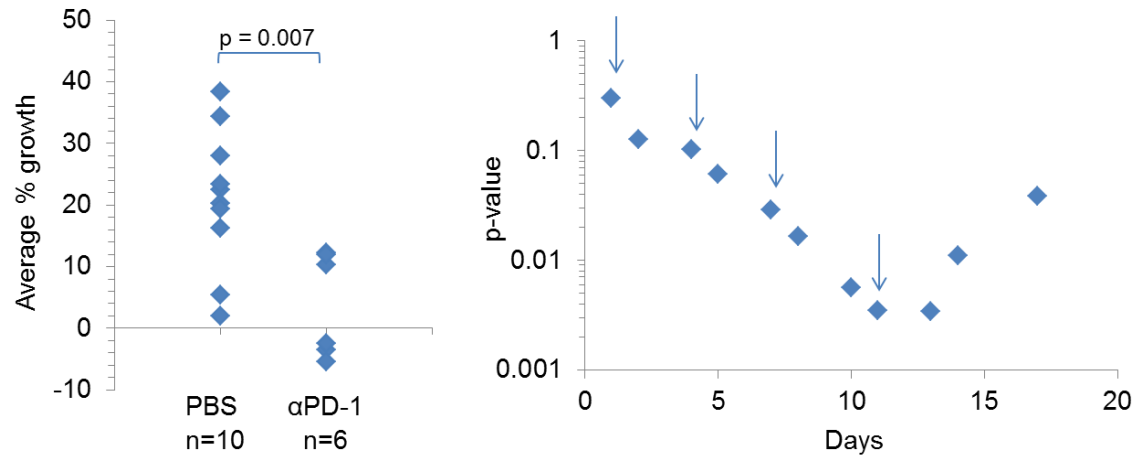

### Humanized Model

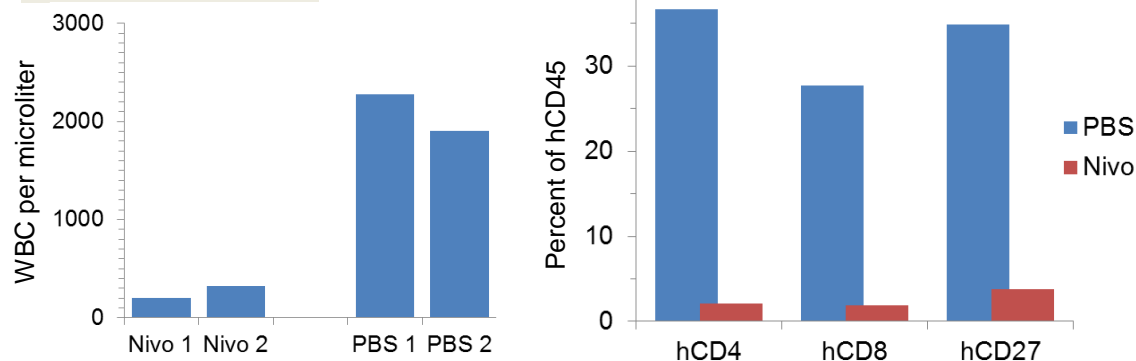

### Figure S4. Mouse models of aggressive ATLL do not recapitulate rapid progression seen in patients

Nivolumab causes reduced white cell count, reduced human CD4 T cell count and reduced total human cells in PDX model.

Mouse PD-1 antibody causes decreased tumor growth in Tax mice. Fewer human T cells expressing CD4, CD8 or CD27 are present in spleen of HTLV-1 infected humanized mice treated with nivolumab compared to PBS.

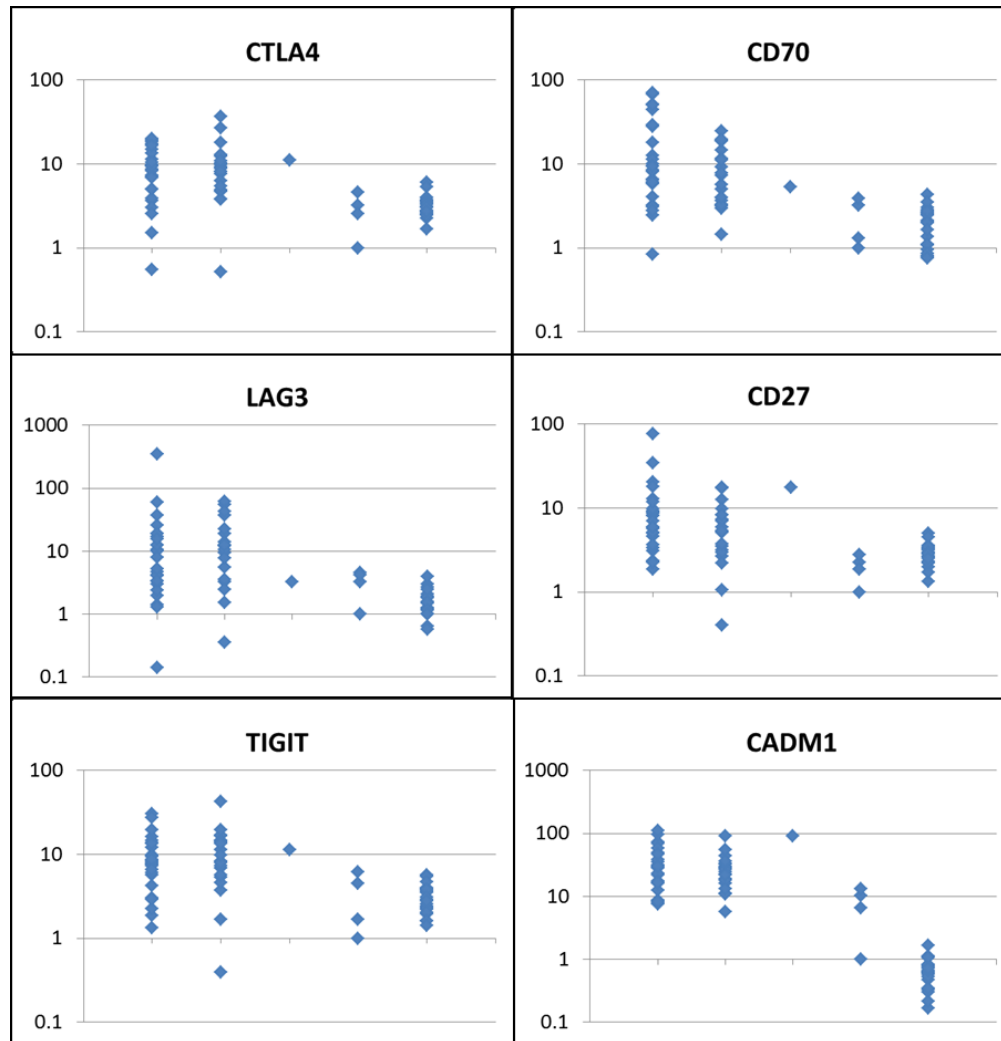

Columns Left to Right

Acute (n=26)

Chronic (n=20)

Lymphoma (n=1)

Smoldering (n=4)

Normal (n=21)

**Figure S5: Increased Expression of checkpoints in ATLL.** Data from an ATLL gene expression microarray study by Nakano was downloaded from the Gene Expression Omnibus at the NCBI (GEO accession: GSE33615). In the original study, RNA was extracted from PBMCs isolated from patients with acute (n=26), chronic (n=20), lymphomatous (n=1), and smoldering (n=4) ATLL, and compared to RNA obtained from CD4+ cells from 21 normal subjects. In this study, values were normalized to actin (ACTB) then represented as fold-Patient 10 (a smoldering ATLL sample with the lowest proviral load in the study).

**Figure S6: Immune response in chronic and smoldering forms of ATLL is similar to patients who achieve operational tolerance after allogeneic transplantation.** Analysis of microarray data as described in Figure S7. Red bar represents the median. Genes shown are elevated ( $p < 0.01$ ) in chronic and smoldering disease but not in normal patients or patients with acute ATLL.

Columns Left to Right  
 Acute (n=26)  
 Chronic (n=20)  
 Smoldering (n=4)  
 Normal (n=21)

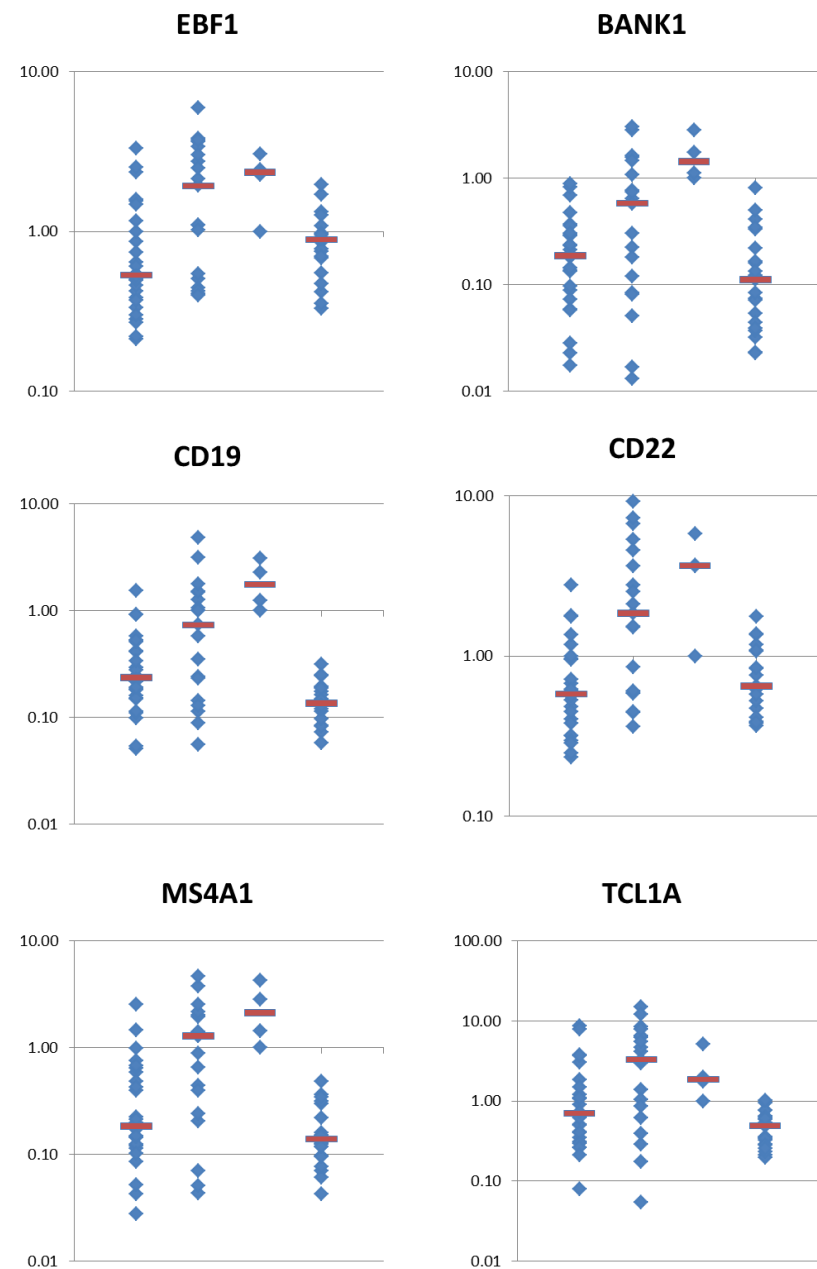

**Figure S7: Human T-cell leukemia virus (HTLV) integration sites among 5 samples from 3 individuals. (A)**

The number of 1KB windows across the genome associated with HTLV reads, the total number of normalized HTLV associated reads, and the total number of mapped (aligned) reads are shown for each sample. (B) The percentage of HTLV reads for each sample associated with an integration site summing to 100%. Binned Sites represent grouped integration sites for which the percentage of HTLV reads was less than 1%. (C) The frequency of normalized HTLV reads associated with the top integration site for each of the three patients is shown in the context of the full chromosomes. The top integration sites occurred on chromosome 2 for two patients (002 and 003) and chromosome 20 for the third patient (001). Triangles represent the top integration site for each sample in terms of the frequency of HTLV reads. Colors for all samples remain the same for each panel in the figure.

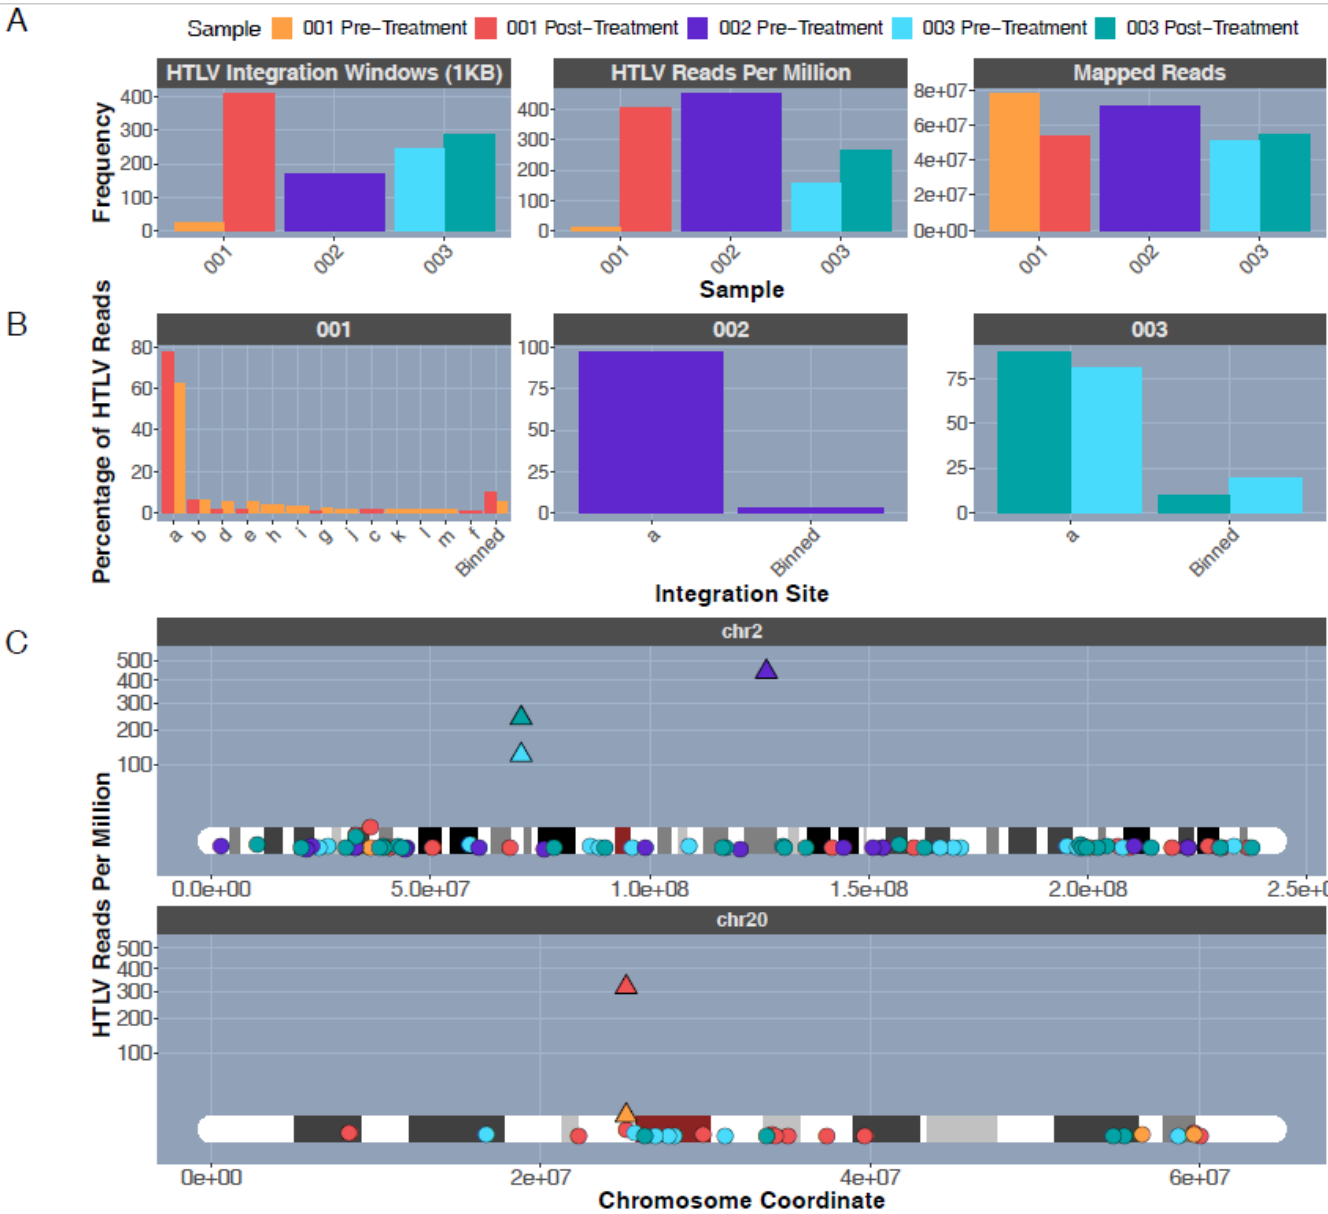

## CONSORT 2010 Flow Diagram

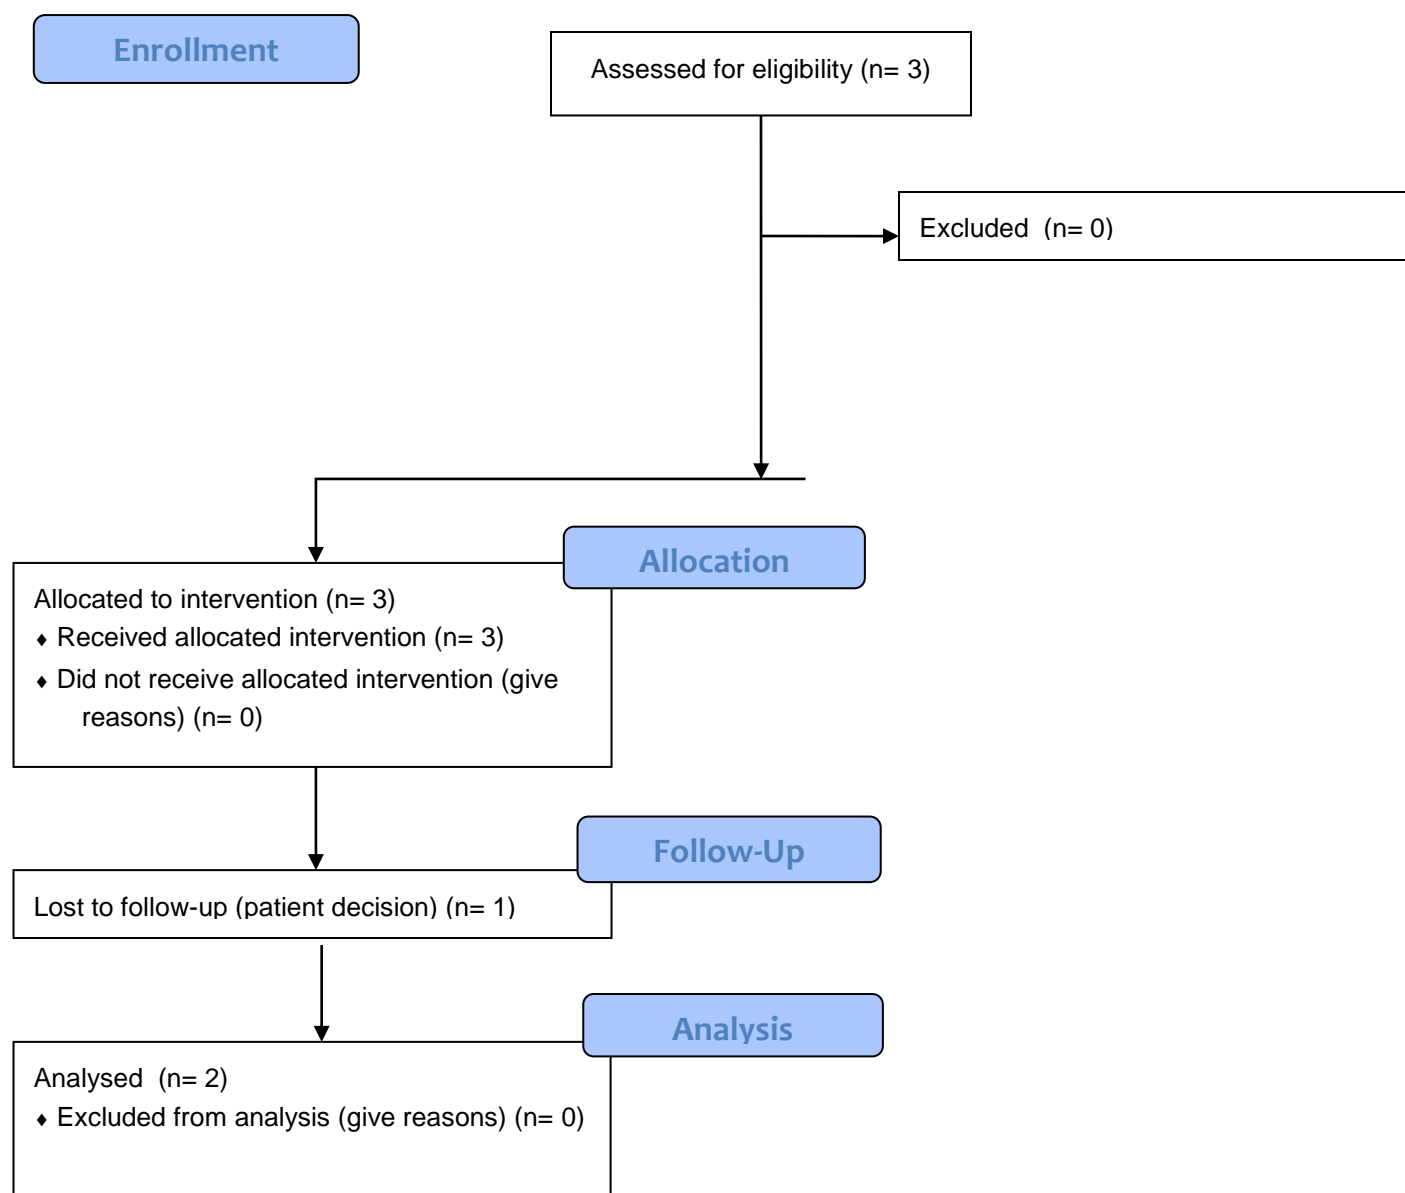

Supplement: bloodBLD2019002038-suppl1.pdf [file bloodBLD2019002038-suppl1.pdf]
